# Supplementary material for: Validation of a classification to identify emergency department visits suitable for subacute and virtual care models: a randomised single-blinded agreement study protocol
Source: HighWire-hosted journal article supplement (doi:10.1136/bmjopen-2022-068488), 2022-12-01
Supplement: bmjopen-2022-068488supp001_data_supplement.pdf [file bmjopen-2022-068488supp001_data_supplement.pdf]

**Appendix 1**

Criteria of the Emergency Department Avoidability Classification (EDAC).

| <b>Patient Characteristic</b>                 | <b>Categorization</b>                                 | <b>EDAC Specification</b>                                                                                                                                                                                                                                                                                                                            |
|-----------------------------------------------|-------------------------------------------------------|------------------------------------------------------------------------------------------------------------------------------------------------------------------------------------------------------------------------------------------------------------------------------------------------------------------------------------------------------|
| <b>Age</b>                                    | Years                                                 | 18 to 70                                                                                                                                                                                                                                                                                                                                             |
| <b>Triage Acuity</b>                          | Canadian Triage and Acuity Scale (CTAS)               | 4 and 5                                                                                                                                                                                                                                                                                                                                              |
| <b>Specialist consult performed in the ED</b> | Yes/No                                                | No specialist consult performed in the ED                                                                                                                                                                                                                                                                                                            |
| <b>ED Visit Disposition</b>                   | Categorical                                           | Discharged from ED                                                                                                                                                                                                                                                                                                                                   |
| <b>Main Physician Intervention</b>            | Canadian Classification of Health Interventions (CCI) | Appendix 1 <sup>17</sup> : Strum RP, Tavares W, Worster A, Griffith LE, Costa AP. Emergency department interventions that could be conducted in subacute care settings for patients with nonemergent conditions transported by paramedics: a modified Delphi study. <i>Can Med Assoc Open Access J.</i> 2022;10(1):E1-E7. doi:10.9778/cmajo.20210148 |
